# Supplementary material
Source: PubMed Central journal article supplement (PMC4587542)
Supplement: NIHMS64519-supplement-Supplemental_Table_I.pdf [file NIHMS64519-supplement-Supplemental_Table_I.pdf]

**Supplemental Table I. Associations between gallstone disease and incident ischemic heart disease by baseline subgroup**

|                             | No                |      | Yes               |                  | P value for interaction |
|-----------------------------|-------------------|------|-------------------|------------------|-------------------------|
|                             | Case/person-years | HR   | Case/person-years | HR (95% CI)      |                         |
| <b>Total</b>                |                   |      |                   |                  |                         |
| Age < 50 year               | 5,084/1,577,415   | 1.00 | 310/73,468        | 1.24 (1.11–1.39) |                         |
| 50 to < 60 year             | 7,216/984,925     | 1.00 | 676/70,089        | 1.27 (1.17–1.38) | 0.257                   |
| ≥ 60 year                   | 10,717/671,139    | 1.00 | 956/54,089        | 1.17 (1.10–1.26) |                         |
| Not current regular smoker  | 16,746/2,355,163  | 1.00 | 1,610/163,999     | 1.23 (1.16–1.29) | 0.830                   |
| Current regular smoker      | 6,271/878,315     | 1.00 | 332/33,647        | 1.22 (1.09–1.36) |                         |
| Not current regular drinker | 20,015/2,732,850  | 1.00 | 1,769/178,299     | 1.22 (1.16–1.28) | 0.871                   |
| Current regular drinker     | 3,002/500,628     | 1.00 | 173/19,347        | 1.26 (1.08–1.47) |                         |
| MET 0-                      | 10,929/989,631    | 1.00 | 998/64,930        | 1.26 (1.18–1.35) |                         |
| MET 12.29-                  | 6,770/1,098,927   | 1.00 | 567/70,791        | 1.17 (1.07–1.28) | 0.245                   |
| MET 25.31-                  | 5,318/1,144,921   | 1.00 | 377/61,925        | 1.23 (1.11–1.37) |                         |
| BMI < 24.0                  | 11,702/1,855,976  | 1.00 | 879/100,513       | 1.25 (1.17–1.34) |                         |
| BMI 24.0 to < 28.0          | 8,018/1,055,266   | 1.00 | 710/71,735        | 1.17 (1.09–1.27) | 0.366                   |
| BMI ≥ 28.0                  | 3,297/322,236     | 1.00 | 353/25,398        | 1.31 (1.17–1.47) |                         |
| Non-abdominal obesity       | 12,696/2,166,037  | 1.00 | 867/111,232       | 1.23 (1.14–1.32) | 0.459                   |
| Abdominal obesity           | 10,321/1,067,441  | 1.00 | 1,075/86,414      | 1.23 (1.15–1.31) |                         |
| No hypertension             | 10,765/2,170,637  | 1.00 | 998/128,217       | 1.30 (1.21–1.38) | <0.001                  |
| Hypertension                | 12,252/1,062,842  | 1.00 | 944/69,429        | 1.16 (1.08–1.24) |                         |
| No diabetes                 | 20,582/3,074,937  | 1.00 | 1,700/183,687     | 1.23 (1.17–1.29) | 0.256                   |
| Diabetes                    | 2,435/158,541     | 1.00 | 242/13,959        | 1.22 (1.07–1.40) |                         |
| <b>Men</b>                  |                   |      |                   |                  |                         |
| Age < 50 year               | 2,027/614,600     | 1.00 | 84/19,100         | 1.26 (1.01–1.57) |                         |
| 50 to < 60 year             | 2,758/407,986     | 1.00 | 132/16,913        | 1.11 (0.93–1.32) | 0.646                   |
| ≥ 60 year                   | 4,987/314,947     | 1.00 | 257/14,985        | 1.07 (0.95–1.22) |                         |
| Not current regular smoker  | 4,008/499,710     | 1.00 | 215/22,240        | 1.03 (0.89–1.18) | 0.097                   |
| Current regular smoker      | 5,764/837,822     | 1.00 | 258/28,758        | 1.20 (1.06–1.36) |                         |
| Not current regular drinker | 7,049/876,503     | 1.00 | 333/34,963        | 1.07 (0.96–1.19) | 0.175                   |
| Current regular drinker     | 2,723/461,030     | 1.00 | 140/16,035        | 1.25 (1.05–1.48) |                         |
| MET 0-                      | 4,454/384,482     | 1.00 | 249/17,439        | 1.08 (0.95–1.23) |                         |
| MET 12.29-                  | 2,790/411,948     | 1.00 | 128/16,607        | 1.10 (0.92–1.31) | 0.566                   |
| MET 25.31-                  | 2,528/541,102     | 1.00 | 96/16,952         | 1.25 (1.02–1.53) |                         |
| BMI <24.0                   | 5,394/792,038     | 1.00 | 215/25,701        | 1.15 (1.00–1.32) |                         |
| BMI 24.0 to < 28.0          | 3,267/431,488     | 1.00 | 179/19,336        | 1.04 (0.90–1.22) | 0.540                   |
| BMI ≥ 28.0                  | 1,111/114,006     | 1.00 | 79/5,962          | 1.25 (0.99–1.58) |                         |
| Non-abdominal obesity       | 6,972/1,064,288   | 1.00 | 284/36,902        | 1.09 (0.97–1.23) | 0.874                   |
| Abdominal obesity           | 2,800/273,245     | 1.00 | 189/14,096        | 1.16 (1.00–1.34) |                         |
| No hypertension             | 4,411/869,682     | 1.00 | 199/32,549        | 1.04 (0.90–1.20) | 0.216                   |
| Hypertension                | 5,361/467,851     | 1.00 | 274/18,449        | 1.17 (1.04–1.32) |                         |
| No diabetes                 | 8,817/1,275,379   | 1.00 | 408/47,292        | 1.12 (1.01–1.24) | 0.721                   |

|                             | No                |      | Yes               |                  | P value for interaction |
|-----------------------------|-------------------|------|-------------------|------------------|-------------------------|
|                             | Case/person-years | HR   | Case/person-years | HR (95% CI)      |                         |
| Diabetes                    | 955/62,154        | 1.00 | 65/3,706          | 1.12 (0.87–1.44) |                         |
| <b>Women</b>                |                   |      |                   |                  |                         |
| Age <50 year                | 3,057/962,815     | 1.00 | 226/54,368        | 1.23 (1.07–1.41) | 0.484                   |
| 50 to < 60 year             | 4,458/576,939     | 1.00 | 544/53,176        | 1.33 (1.21–1.46) |                         |
| ≥ 60 year                   | 5,730/356,192     | 1.00 | 699/39,104        | 1.23 (1.13–1.33) |                         |
| Not current regular smoker  | 12,738/1,855,453  | 1.00 | 1,395/141,759     | 1.27 (1.20–1.34) | 0.928                   |
| Current regular smoker      | 507/40,493        | 1.00 | 74/4,889          | 1.29 (1.01–1.66) |                         |
| Not current regular drinker | 12,966/1,856,347  | 1.00 | 1,436/143,336     | 1.27 (1.20–1.34) | 0.990                   |
| Current regular drinker     | 279/39,598        | 1.00 | 33/3,312          | 1.38 (0.95–2.00) |                         |
| MET 0-                      | 6,475/605,149     | 1.00 | 749/47,490        | 1.34 (1.24–1.45) | 0.154                   |
| MET 12.29-                  | 3,980/686,979     | 1.00 | 439/54,183        | 1.19 (1.08–1.32) |                         |
| MET 25.31-                  | 2,790/603,818     | 1.00 | 281/44,974        | 1.22 (1.08–1.38) |                         |
| BMI <24.0                   | 6,308/1,063,938   | 1.00 | 664/74,812        | 1.29 (1.19–1.40) | 0.573                   |
| BMI 24.0 to < 28.0          | 4,751/623,778     | 1.00 | 531/52,399        | 1.23 (1.12–1.35) |                         |
| BMI ≥ 28.0                  | 2,186/208,230     | 1.00 | 274/19,437        | 1.32 (1.16–1.50) |                         |
| Non-abdominal obesity       | 5,724/1,101,749   | 1.00 | 583/74,329        | 1.31 (1.20–1.43) | 0.139                   |
| Abdominal obesity           | 7,521/794,196     | 1.00 | 886/72,319        | 1.24 (1.15–1.33) |                         |
| No hypertension             | 6,354/1,300,955   | 1.00 | 799/95,668        | 1.39 (1.29–1.50) | <0.001                  |
| Hypertension                | 6,891/594,991     | 1.00 | 670/50,980        | 1.15 (1.06–1.24) |                         |
| No diabetes                 | 11,765/1,799,558  | 1.00 | 1,292/136,395     | 1.27 (1.20–1.35) | 0.409                   |
| Diabetes                    | 1,480/96,388      | 1.00 | 177/10,253        | 1.25 (1.06–1.46) |                         |

HR indicates hazard ratio; CI, confidence interval; MET, metabolic equivalent tasks hours per day (MET-hr/day); BMI, body mass index (kg/m<sup>2</sup>). Multivariate models were adjusted for: age, gender (for whole cohort only), education, marital status, alcohol consumption, smoking status, physical activity, intake frequencies of red meat, fresh fruits, and vegetables, prevalent hypertension, prevalent diabetes, family history of heart attack, menopausal status (for women only), and body mass index.
